# Supplementary material for: 3D-printed devices for multiplexed semi-quantitative competitive lateral flow immunoassays
Source: Royal Society of Chemistry journal article supplement (doi:10.1039/d4ay02009j), 2025-01-01
Supplement: d4ay02009j1.pdf [file d4ay02009j1.pdf]

## Electronic Supporting Information

### 3D-printed devices for multiplexed semi-quantitative competitive lateral flow immunoassays

Guodong Tong<sup>1</sup>, Kazushi Misawa<sup>1</sup>, Purim Jarujamrus<sup>1,2,3</sup>, Yuki Hiruta<sup>1</sup>, Daniel Citterio<sup>1</sup>

<sup>1</sup> Department of Applied Chemistry, Faculty of Science and Technology, Keio University, 3-14-1 Hiyoshi, Kohoku ward, Yokohama, Kanagawa 223-8522, Japan.

<sup>2</sup> Department of Chemistry and Center of Excellence for Innovation in Chemistry, Faculty of Science, Ubon Ratchathani University, Ubon Ratchathani 34190, Thailand.

<sup>3</sup> Nanomaterials Science, Sensors & Catalysis for Problem-Based Projects, Faculty of Science, Ubon Ratchathani University, Ubon Ratchathani 34190, Thailand.

## Table of Contents

|                                                                                    |     |
|------------------------------------------------------------------------------------|-----|
| 1. Design of device type B.....                                                    | S3  |
| 2. Details and layouts of all pads .....                                           | S4  |
| 3. Details and design sketches of 3D models.....                                   | S5  |
| 4. Design of cap for device type B and P.....                                      | S8  |
| 5. Definition of $\Delta$ Gray value.....                                          | S9  |
| 6. Results of text-displaying assay.....                                           | S10 |
| 7. Composition of artificial urine.....                                            | S11 |
| 8. Relationship between combined ratio and initial concentration of Ab and Ag..... | S12 |

1. Design of device type B

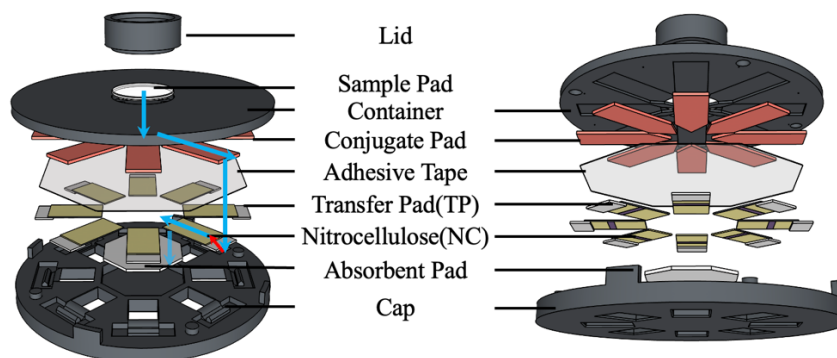

**Fig. S1** Design of device type B with 8 LFIA lanes for plastic-backed nitrocellulose membranes; blue/red arrows represent the sample liquid flow path on the example of a single LFIA lane.

2. Details and layouts of all pads

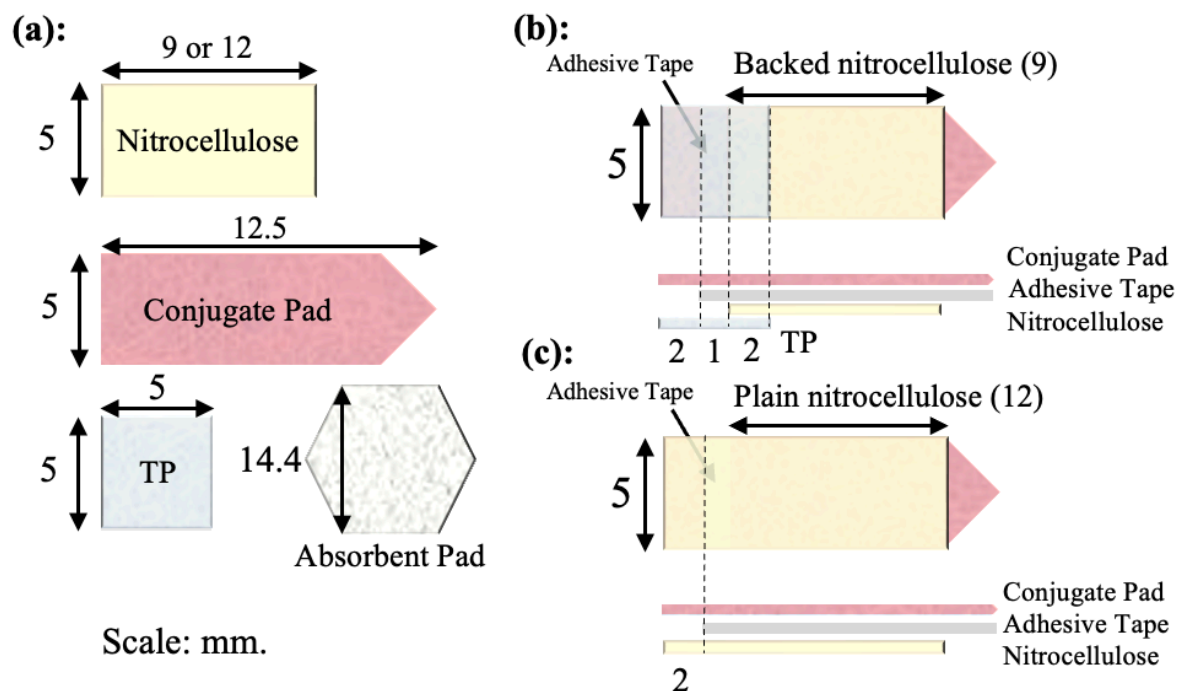

**Fig. S2** Details of size and arrangement of all components used for LFIA preparation in each lane: (a) cutting dimensions of all pads (TP: transfer pad); pad arrangement for device types B (b) and P (c); all numerals indicate dimensions in mm.

### 3. Details and design sketches of 3D models

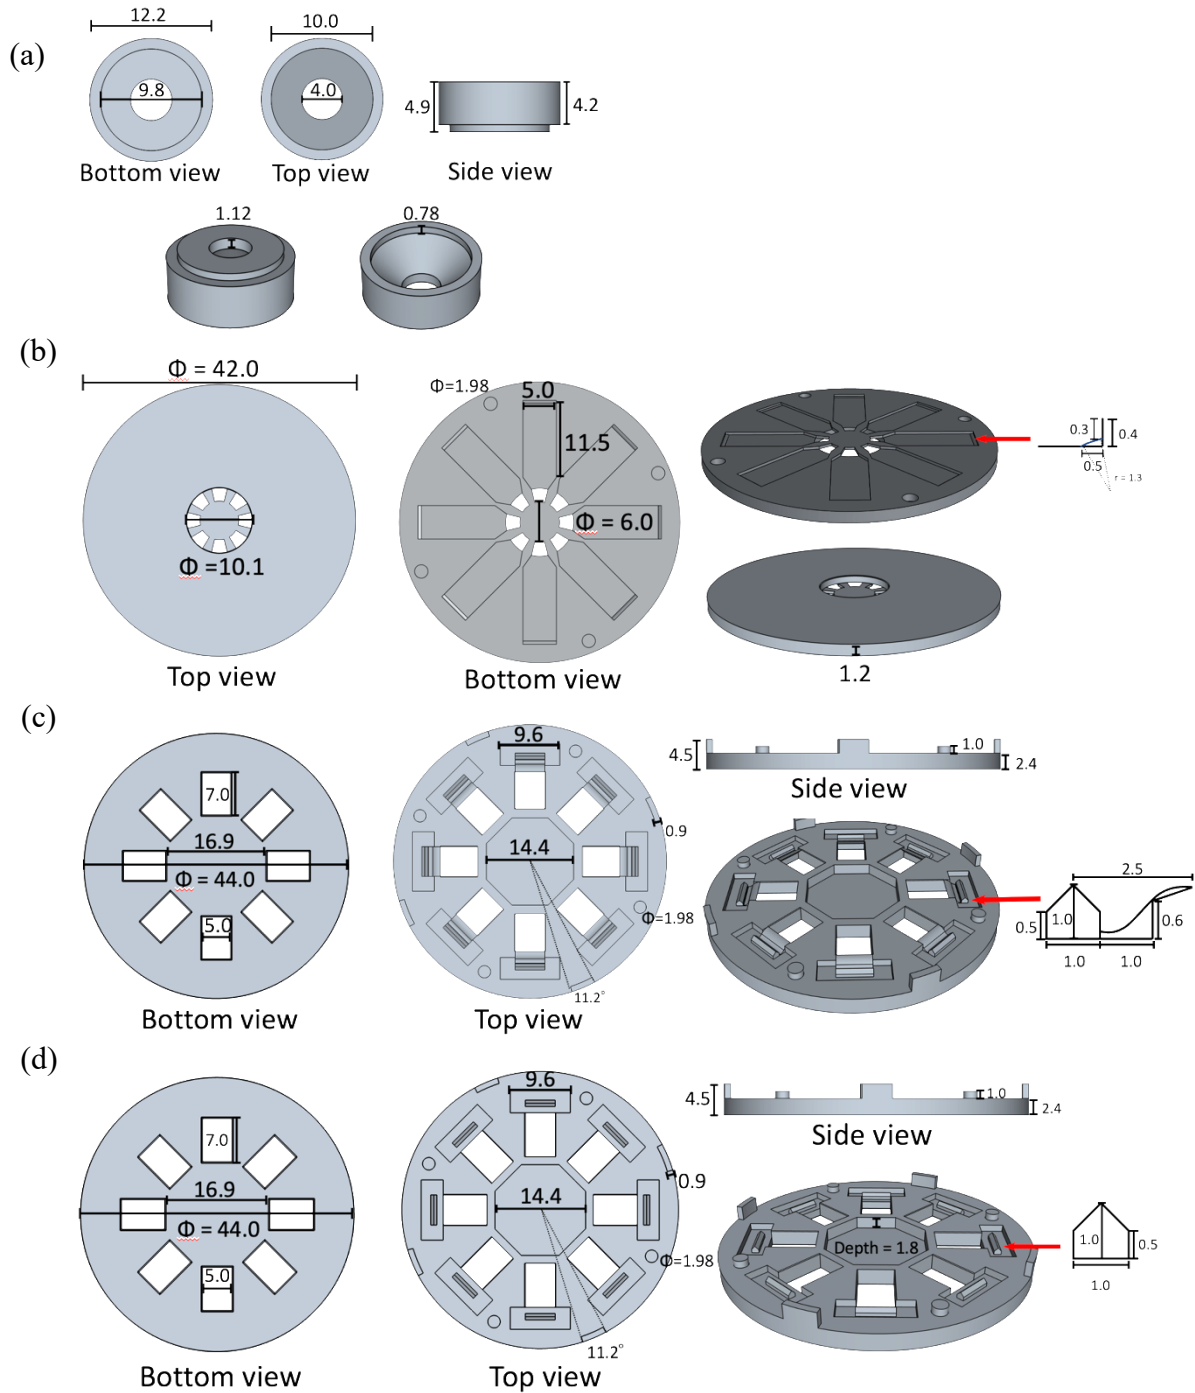

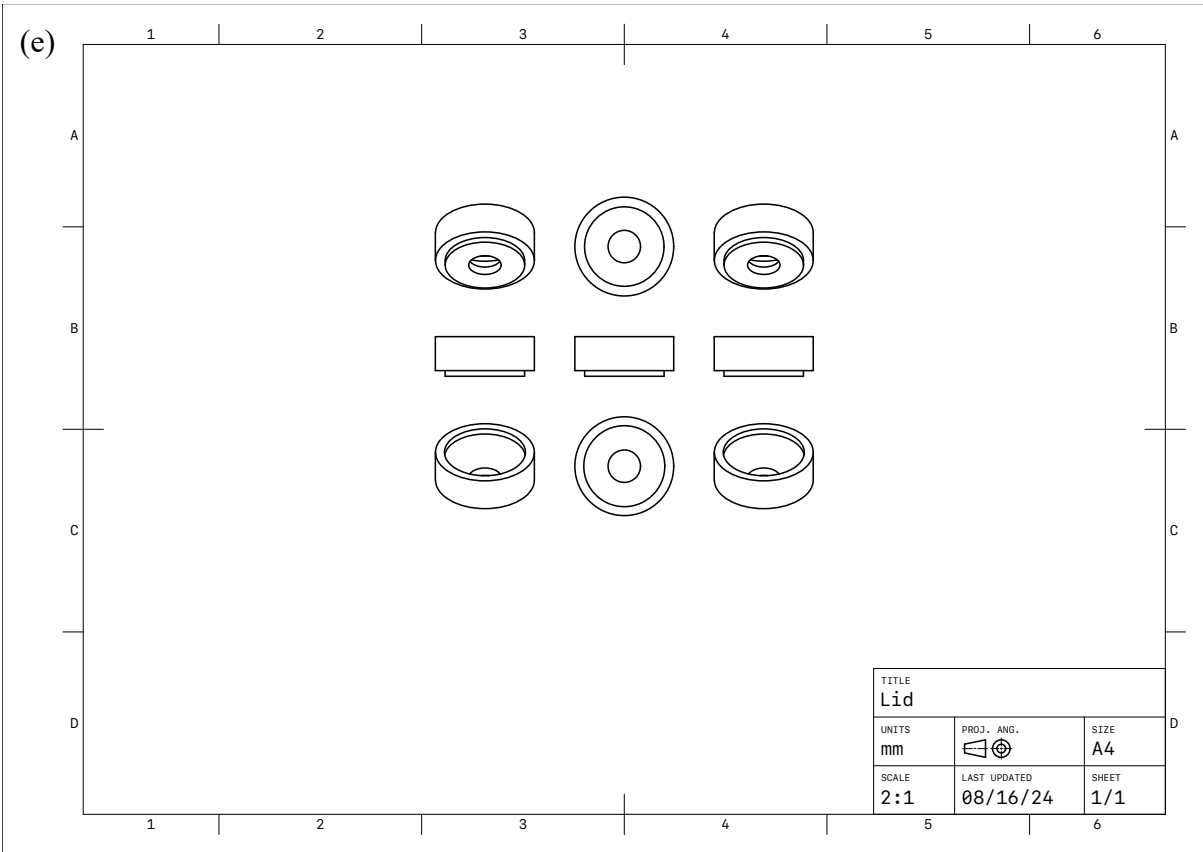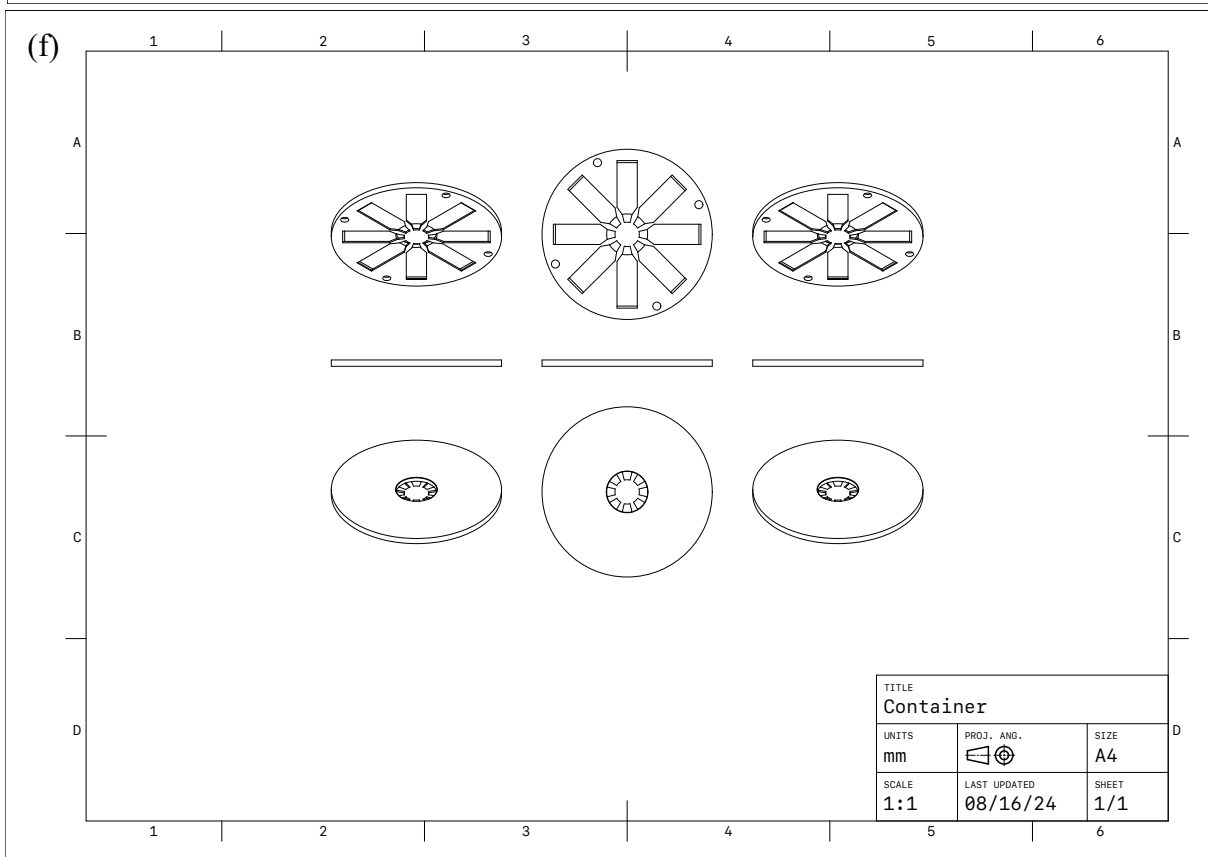

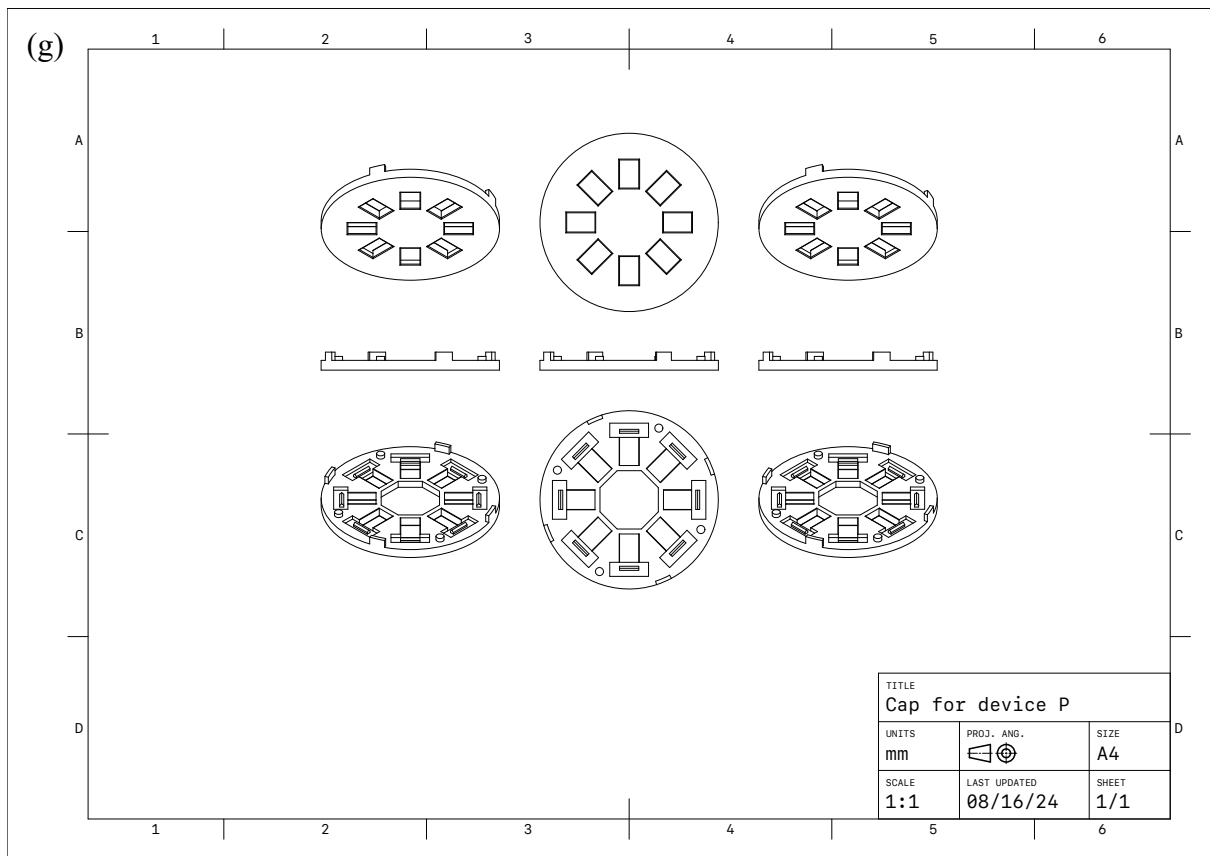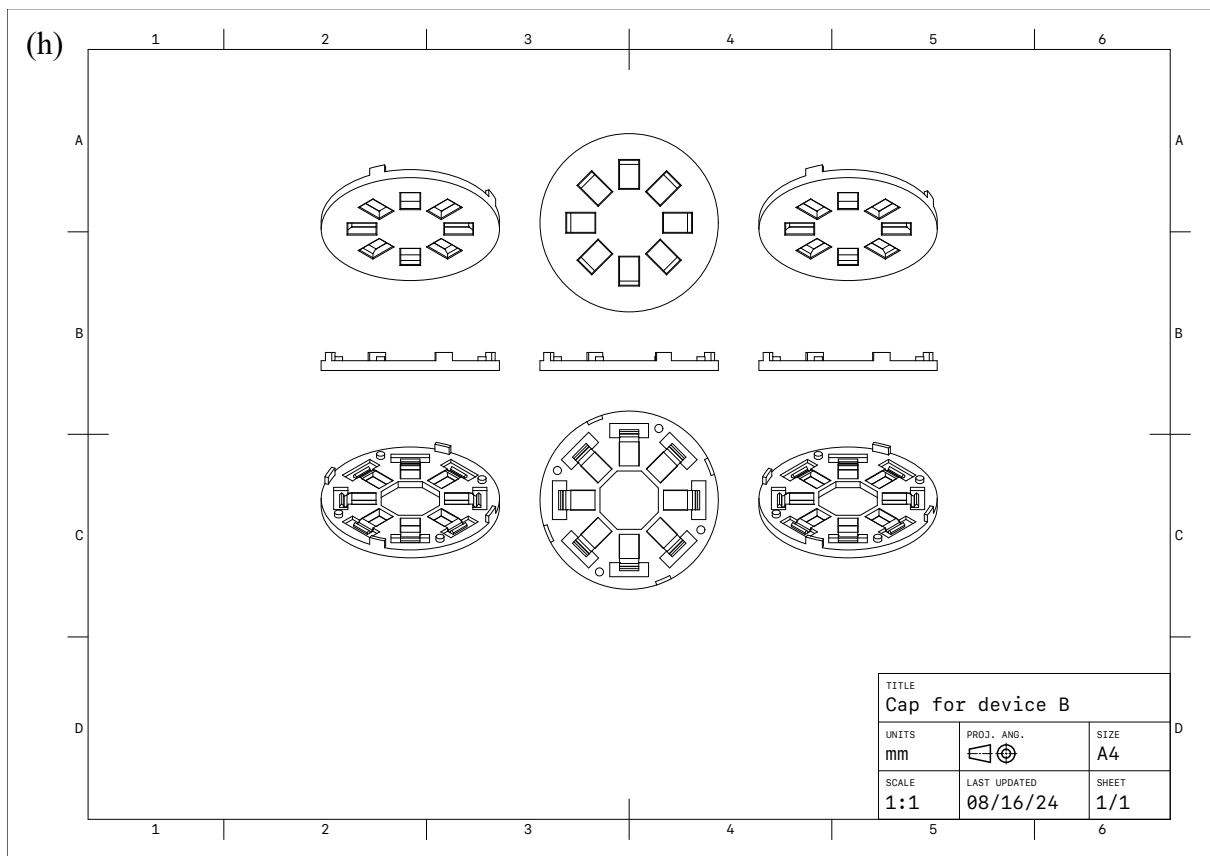

**Fig. S3** Sketches for Lid (a, e), Container (b, f), Cap for device P (c, g), and Cap for device B (d, h); all numerals indicate dimensions in mm.

#### 4. Design of cap for device type B and P

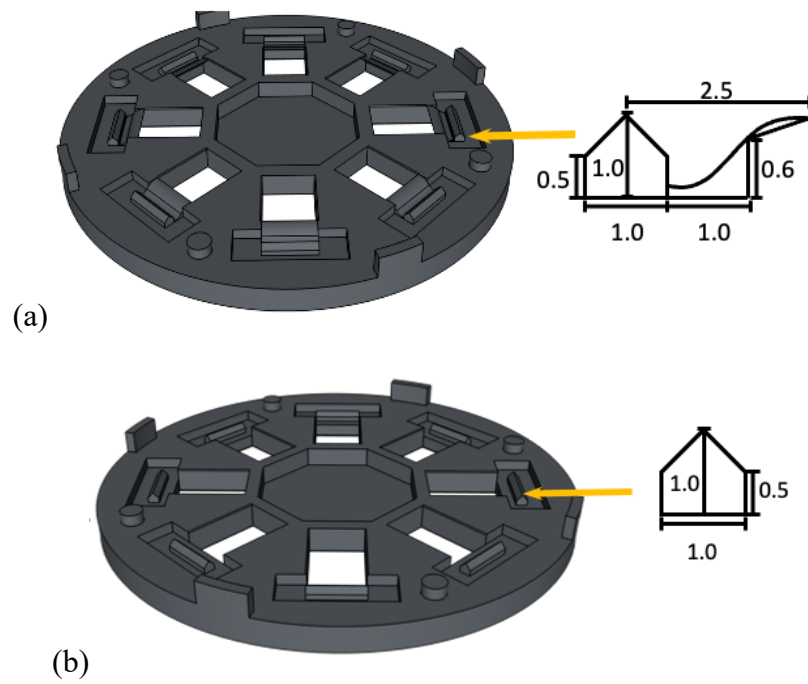

**Fig. S4** Details of cap supporting protrusion sections for device type B (a) and type P (b); all numerals indicate dimensions in mm.



## 5. Definition of $\Delta$ Gray value

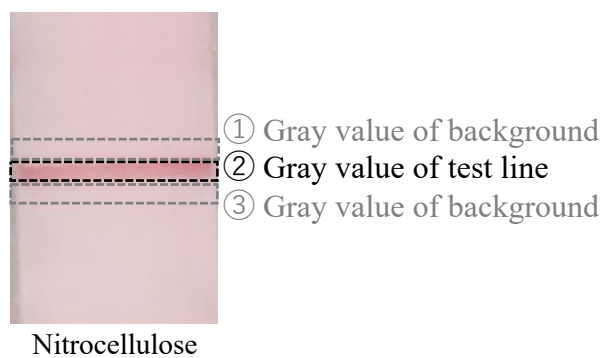

$$\Delta\text{Gray value} = (\textcircled{1} + \textcircled{3}) / 2 - \textcircled{2}$$

**Fig. S5** Definition and calculation method of the  $\Delta$ Gray value used for quantitative analysis of test line color intensities.

6. Original scanned picture for text-displaying semiquantitative detection

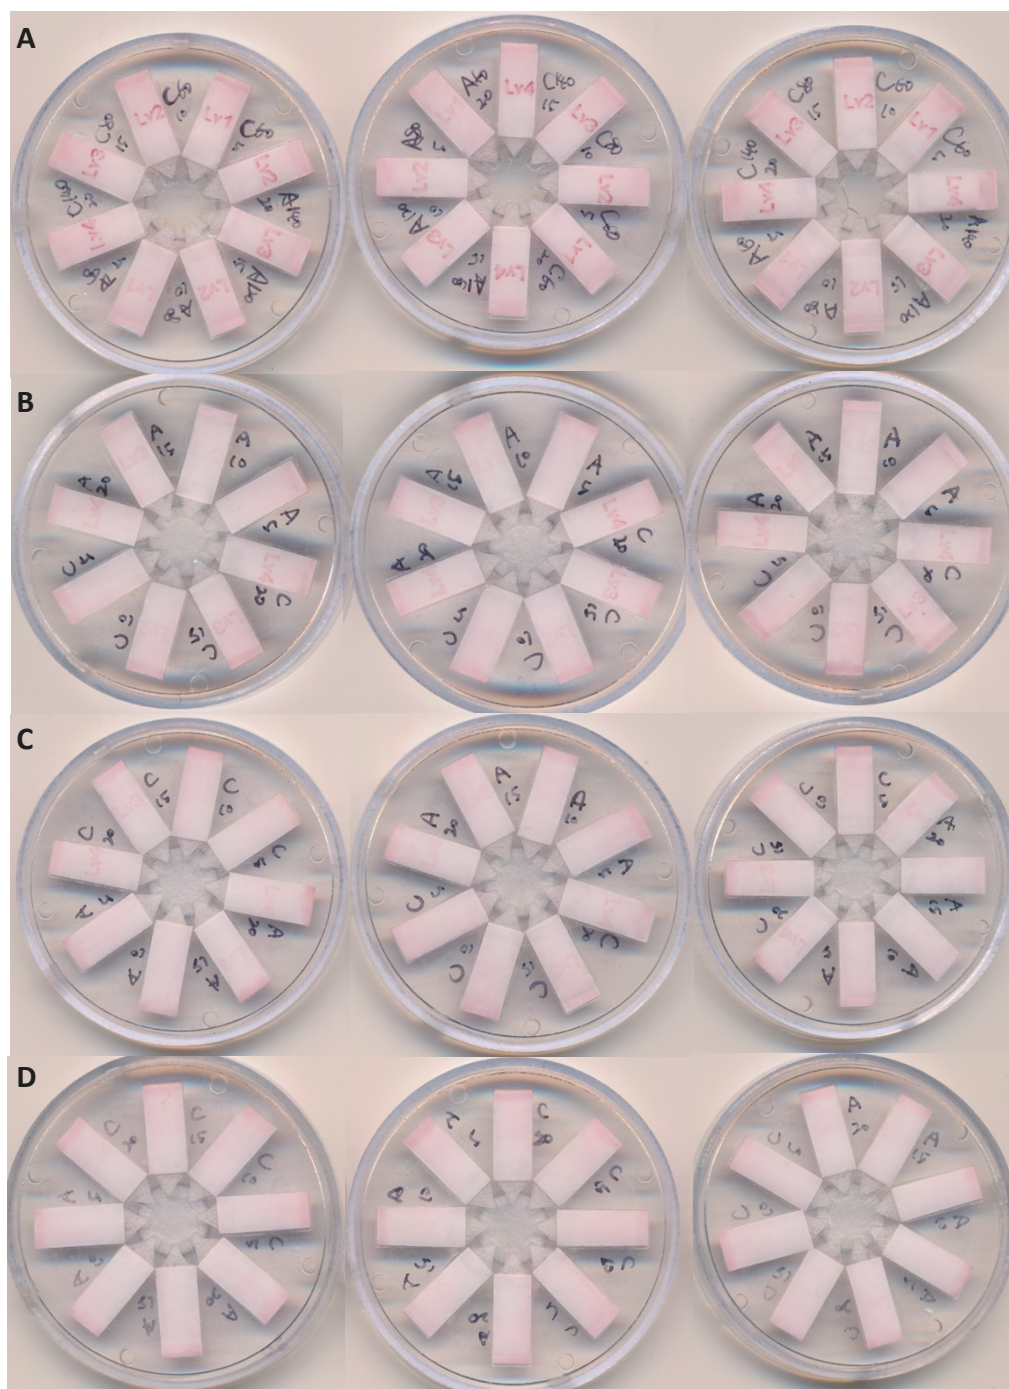

**Fig. S6** Unmodified color scans showing text-displaying results for the semi-quantitative detection of (A) caffeine = 0 ng/mL and acetaminophen = 0 ng/mL, (B) caffeine = 4 ng/mL and acetaminophen = 4 ng/mL, (C) caffeine = 10 ng/mL and acetaminophen = 8 ng/mL, (D) caffeine = 175 ng/mL and acetaminophen = 12 ng/mL in artificial urine samples; all experiments have been performed in triplicate with the results of 3 devices shown in each row.

7. Composition of artificial urine

**Table S1** Composition of artificial urine samples

| Chemicals                      | Conc.(mM) |
|--------------------------------|-----------|
| Lactic Acid                    | 1.1       |
| Citric Acid                    | 2         |
| Sodium Bicarbonate             | 25        |
| Urea                           | 170       |
| Calcium Chloride               | 2.5       |
| Sodium Chloride                | 90        |
| Magnesium Sulfate              | 2         |
| Sodium Sulfate                 | 10        |
| Potassium Dihydrogen Phosphate | 7         |
| Dipotassium Hydrogen Phosphate | 7         |
| Ammonium Chloride              | 25        |
| Uric Acid                      | 0.4       |
| Creatinine                     | 7         |
| BSA                            | 1(g/L)    |

8. Relationship between combined ratio and initial concentration of Ab and Ag

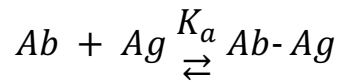

$$K_a = \frac{C}{[Ab][Ag]} = \frac{C}{([Ab]_0 - C)([Ag]_0 - C)}$$

$$C^2 - \left( \frac{1}{K_a} + [Ab]_0 + [Ag]_0 \right) C + [Ab]_0 [Ag]_0 = 0$$

$$C = \frac{\left( \frac{1}{K_a} + [Ab]_0 + [Ag]_0 \right) - \sqrt{\left( \frac{1}{K_a} + [Ab]_0 + [Ag]_0 \right)^2 - 4[Ab]_0 [Ag]_0}}{2}$$

- $K_a$  : Affinity constant( $\approx 10^{12}$ )
- $[Ab]$  : Antibody conc.
- $[Ag]$  : Antigen conc.
- $[Ab-Ag]$  : Complex conc.(C)
- $[Ag]_0$  : Initial antigen conc.
- $[Ab]_0$  : Initial antibody conc.
- **Combined ratio[%] =  $C / [Ab]_0 \times 100\%$**

**Eq. S1** Relationship between immunocomplex and the concentration of antibody or antigen
